# Supplementary material for: Formation of uniform mesoporous TiO2@C–Ni hollow hybrid composites
Source: Royal Society of Chemistry journal article supplement (doi:10.1039/c8dt02056f), 2018-01-01
Supplement: c8dt02056f1.pdf [file c8dt02056f1.pdf]

## Supporting Information

### Formation of Uniform Mesoporous $\text{TiO}_2@\text{C-Ni}$ Hollow Hybrid Composites

Yang Ling,<sup>a</sup> Min Zhang<sup>\*a</sup>, Xiaokai Li,<sup>b</sup> Jing Zheng<sup>a</sup> and Jingli Xu<sup>a</sup>

<sup>a</sup> Yang Ling, Min Zhang, Jing Zheng, Jingli Xu

College of Chemistry and Chemical Engineering, Shanghai University of Engineering Science, Shanghai

201620, PR China

E-mail: zhangmin@sues.edu.cn

<sup>b</sup> Xiaokai Li

Shanghai World Foreign Language Middle School

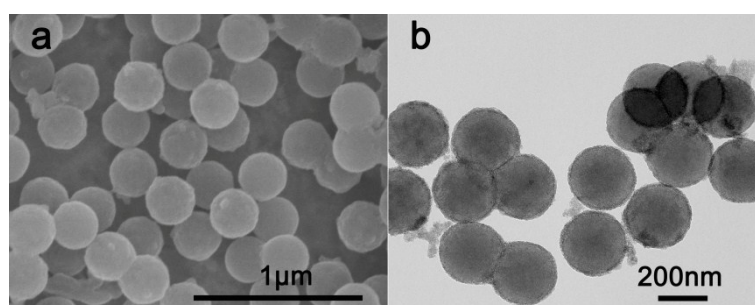

Fig. S1 SEM and TEM images of the CPS@TiO<sub>2</sub> nanospheres.

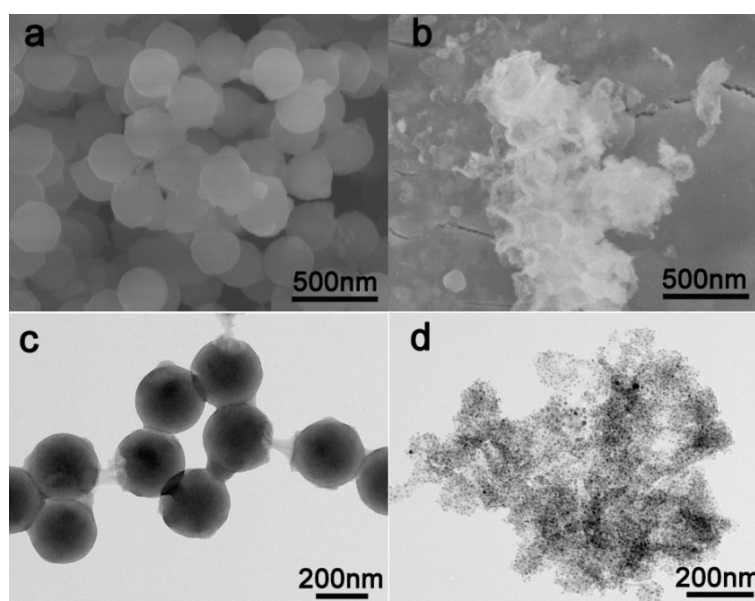

Fig. S2 (a, b) SEM and (c, d) TEM images of the CPS@PDA-Ni<sup>2+</sup> and C-Ni nanospheres.

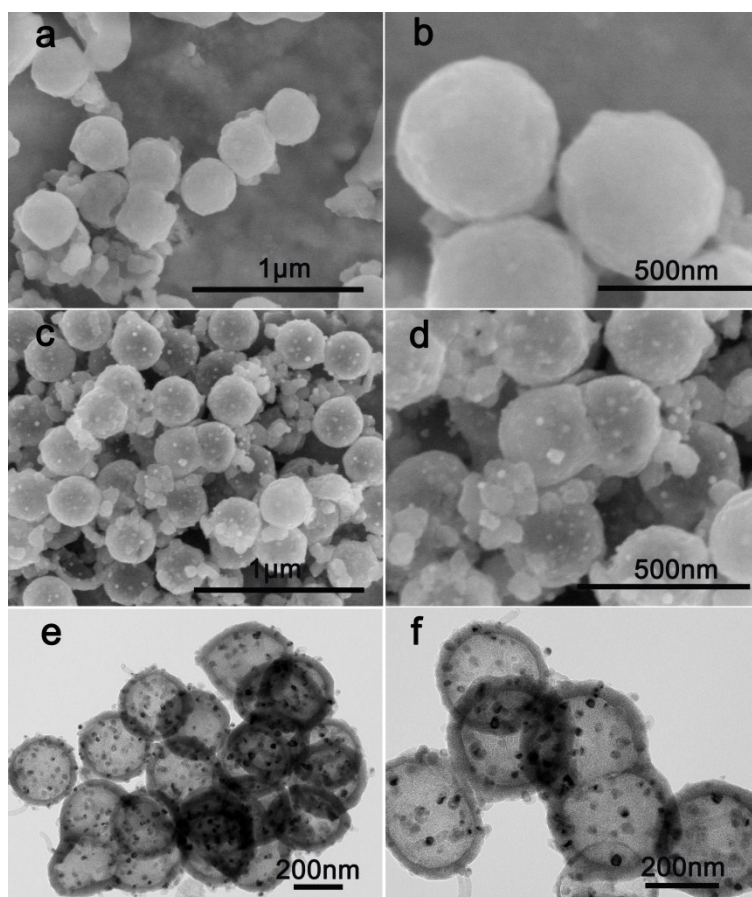

Fig. S3 SEM image of the CPS@TiO<sub>2</sub>@PDA-Ni<sup>2+</sup> nanospheres (a, b), SEM(c, d) and TEM images (e, f) of the hollow TiO<sub>2</sub>@C-Ni nanospheres.

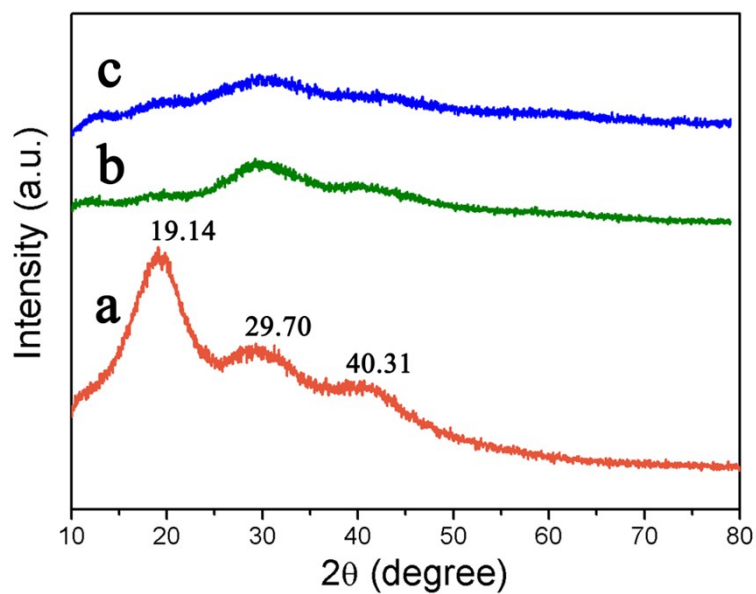

Fig. S4 XRD diffraction patterns of CPS(a); CPS@mTiO<sub>2</sub> (b) and CPS@mTiO<sub>2</sub>@PDA-Ni<sup>2+</sup> (c).

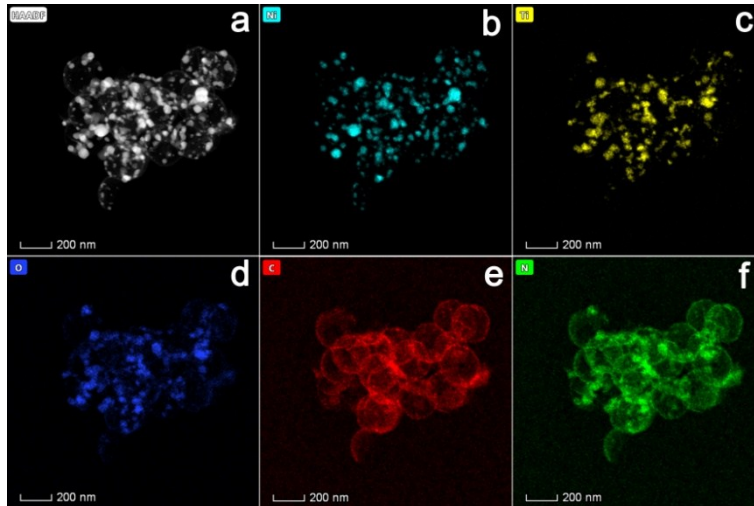

Fig. S5 (a) STEM image of mTiO<sub>2</sub>@C-Ni/700 and corresponding elemental mappings of (b) Ni, (c)Ti, (d) O, (e) C and (f) N.

---

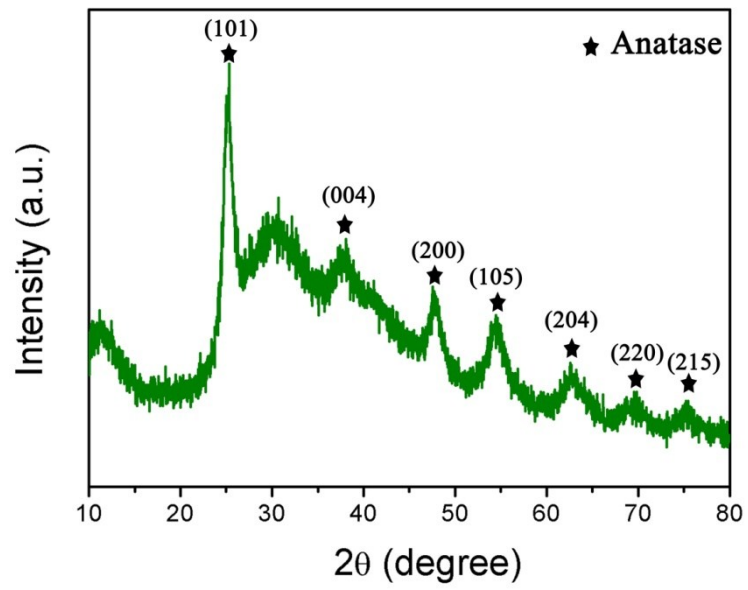

Fig. S6 XRD diffraction patterns of hollow mTiO<sub>2</sub> spheres

---

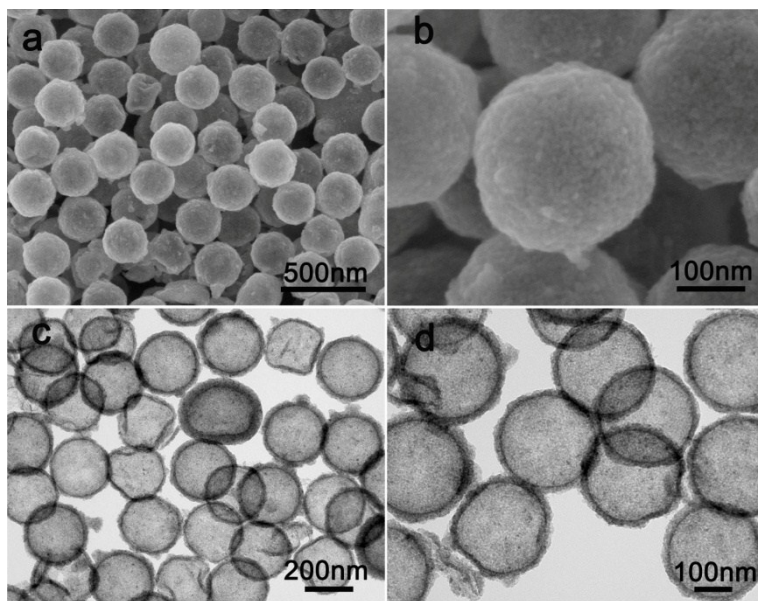

Fig. S7 (a, b) SEM and (c, d) TEM images of the hollow mTiO<sub>2</sub> nanospheres

**Table S1.** A full comparison of the activity parameter  $\kappa$  of mTiO<sub>2</sub>@C-Ni/700 hollow hybrid composites with other noble metal and no-noble catalysts

| Catalyst                                                               | $K(\times 10^{-3}\text{s}^{-1})$ | $k(\times 10^{-3}\text{mg}^{-1}\text{s}^{-1})$ | References |
|------------------------------------------------------------------------|----------------------------------|------------------------------------------------|------------|
| TiO <sub>2</sub> @C-Ni/700                                             | 15.17                            | 173.21                                         | This work  |
| Cu nanoplate                                                           | 9.5                              | 136                                            | 1          |
| SiO <sub>2</sub> @C-Ni                                                 | 5.2                              | 37                                             | 2          |
| Fe <sub>3</sub> O <sub>4</sub> @SiO <sub>2</sub> -Au@mSiO <sub>2</sub> | 7                                | 105                                            | 3          |
| Ag/Cu                                                                  | 6.70                             | 74                                             | 4          |
| AuPd                                                                   | 5.2                              | 74                                             | 5          |
| Au@meso-SiO <sub>2</sub>                                               | 1.33                             | 41.8                                           | 6          |
| PtPdBi                                                                 | 4.3                              | 287                                            | 7          |
| Fe@Au-ATPGO                                                            | 1.4                              | 400                                            | 8          |

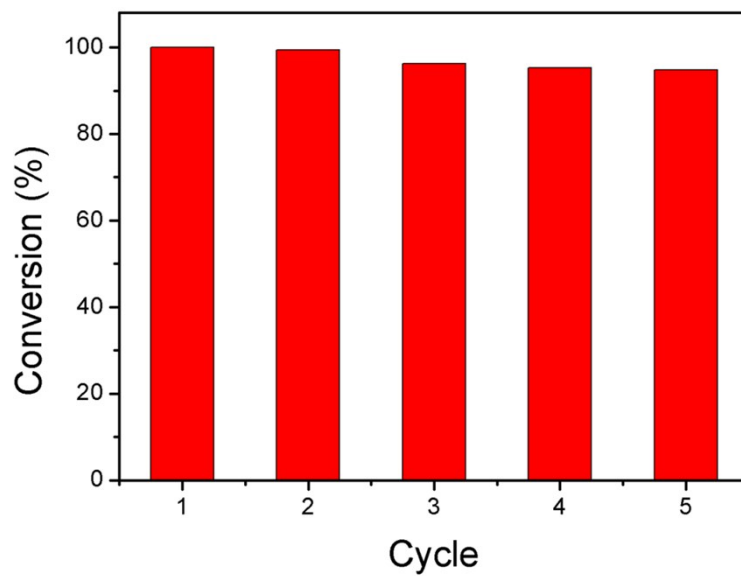

Fig. S8 The reusability of  $mTiO_2@C-Ni/700$  as the catalyst for the reduction of 4-NP with  $NaBH_4$

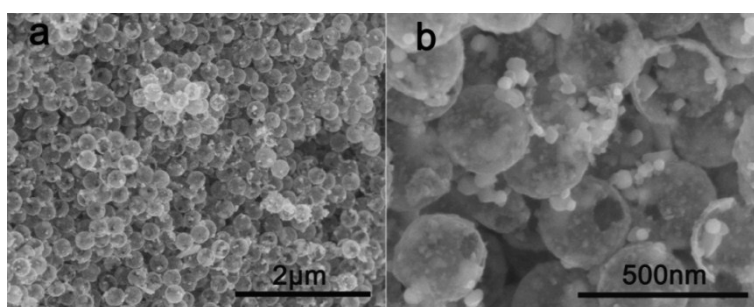

Fig. S9 SEM images of  $mTiO_2@C-Ni/700$  after five catalytic reaction

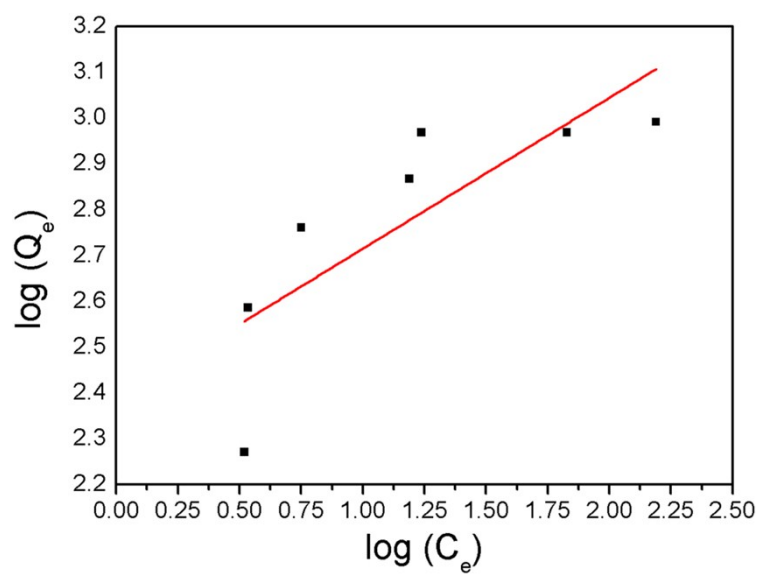

Fig. S10 Linear fitting of adsorption isotherms plots based on Freundlich model.

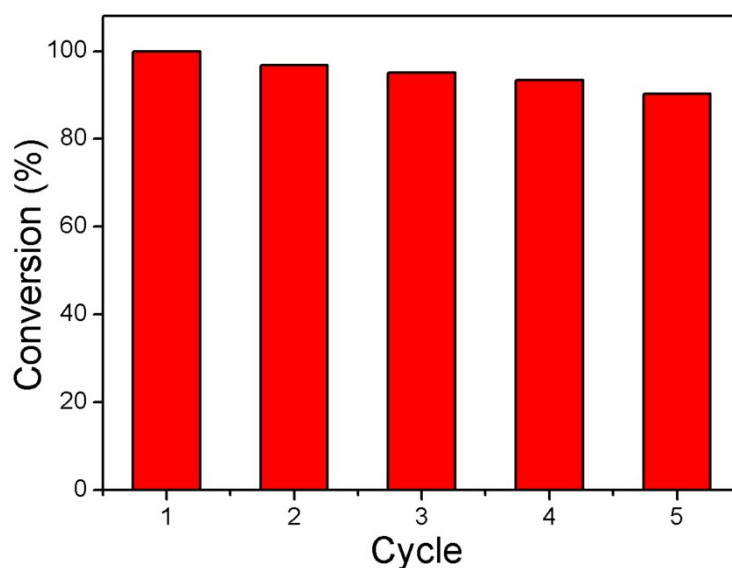

Fig. S11 the recyclability of the mTiO<sub>2</sub>@C-Ni/700 as the absorbent for BHb.

**Table S2** the estimate of Langmuir model and Freundlich model

| Langmuir       |        |                | Freundlich     |      |                |
|----------------|--------|----------------|----------------|------|----------------|
| Q <sub>m</sub> | b      | R <sup>2</sup> | K <sub>F</sub> | n    | R <sup>2</sup> |
| 1027.24        | 0.0067 | 0.99375        | 242.93         | 3.04 | 0.56769        |

## References

1. Y. Sun, L. Xu, Z. Yin and X. Song, *Journal of Materials Chemistry A*, 2013, **1**, 12361-12370.
2. L. Ding, M. Zhang, Y. Zhang, J. Yang, J. Zheng and J. Xu, *Green Chemistry*, 2016, **18**, 6282-6290.
3. Y. Deng, Y. Cai, Z. Sun, J. Liu, C. Liu, J. Wei, W. Li, C. Liu, Y. Wang and D. Zhao, *Journal of the American Chemical Society*, 2010, **132**, 8466-8473.
4. Y. Sun, F. Zhang, L. Xu, Z. Yin and X. Song, *Journal of Materials Chemistry A*, 2014, **2**, 18583-18592.
5. J. Zhang, C. Hou, H. Huang, L. Zhang, Z. Jiang, G. Chen, Y. Jia, Q. Kuang, Z. Xie and L. Zheng, *Small*, 2013, **9**, 538-544.
6. J. Chen, Z. Xue, S. Feng, B. Tu and D. Zhao, *J Colloid Interface Sci*, 2014, **429**, 62-67.
7. Y. Y. Shen, Y. Sun, L. N. Zhou, Y. J. Li and E. Yeung, *Journal of Materials Chemistry A*, 2014, **2**, 2977-2984.
8. V. K. Gupta, N. Atar, M. L. Yola, Ü. Z and L. Uzun, *Water Research*, 2014, **48**, 210-217.
